# Supplementary material for: HBEGF, SRA1, and IK: Three cosegregating genes as determinants of cardiomyopathy
Source: HighWire-hosted journal article supplement (doi:10.1101/gr.076653.108), 2008-12-08
Supplement: Supplementary_Movies_1_to_8.pdf [file Supplementary_Movies_1_to_8.pdf]

### **Supplementary Movies 1 to 8**

Video imaging data for phenotypes of embryos injected with *HBEGF* morpholino (MO-*hbegf*), *SRA1* morpholino (MO-*sra1*) and *IK* morpholino (MO-*ik*) as well as control morpholino (control) at 48 and 72 hpf is available at [www.rottbauerlab.com/genomeresearch/index.html](http://www.rottbauerlab.com/genomeresearch/index.html). a = atrium; v = ventricle
